# Supplementary material for: CCT196969 inhibits TNBC by targeting the HDAC5/RXRA/ASNS axis to down-regulate asparagine synthesis
Source: Research Square preprint supplement (doi:10.21203/rs.3.rs-6601595/v1), 2025-05-16
Supplement: Supplementary file 1 [file 56de5168121949bda971fbc7.docx]

Supplementary Table 1，siRNA and shRNA

| Genes | Sequence |
| --- | --- |
| siRXRA-1 | sense: GCUCCUCAGGCAAACACUAUGTT  antisense: CAUAGUGUUUGCCUGAGGAGCTT |
| siRXRA-2 | sense: GCUCCAUAGCUGUGAAAGAUGTT  antisense: CAUCUUUCACAGCUAUGGAGCTT |
| siRXRA-3 | sense: GGUGUAUGCGUCACUAGAAGCTT  antisense: GCUUCUAGUGACGCAUACACCTT |
| shRXRA | GCTCCTCAGGCAAACACTATG (5’ to 3’) |
| siPOU2F1-1 | sense: CCUGCAACCAGCACAGUUUAUCA  antisense: GAUGAUAAACUGUGCUGGUUGCAGGUU |
| siPOU2F1-2 | sense: ACAGUCUAAAUCCAGUGAATT  antisense: UUCACUGGAUUUAGACUGUAC |
| siPOU2F1-3 | sense: AUCUAGCCCAAGUGCUUUGTT  antisense: CAAAGCACUUGGGCUAGAUGC |
| siKLF5-1 | sense: AAGCUCACCUGAGGACUCATT  antisense: UGAGUCCUCAGGUGAGCUUTT |
| siKLF5-2 | sense: GCUCACCUGAGGACUCAUATT  antisense: UAUGAGUCCUCAGGUGAGCTT |
| shSRC-1 | GCGGCTGCAGATTGTCAATAA (5’ to 3’) |
| shSRC-2 | GACAATGCCAAGGGCCTAAAT (5’to 3’) |
| shSRC-3 | GGCCCAAGTCATGAAGAAACT (5’ to 3’) |
| siBRAF-1 | sense: GCUAGAUGCCCUUCAGCAAAGTT  antisense: CUUUGCUGAAGGGCAUCUAGCTT |
| siBRAF-2 | sense: GGAGUUACAUGUUGAAGUACUTT  antisense: AGUACUUCAACAUGUAACUCCTT |
| siBRAF-3 | sense: GCGUUGUAGUACAGAGGUUCCTT  antisense: GGAACCUCUGUACUACAACGCTT |
| siRAF1-1 | sense: GUCAGAAGUUCCUGCUAAAUGTTJ  antisense: CAUUUAGCAGGAACUUCUGACTT |
| siRAF1-2 | sense: GGCAGAGAGACUCGAGUUAUUTT  antisense: AAUAACUCGAGUCUCUCUGCCTT |
| siRAF1-3 | sense: GCAUGGAGAUGUUGCAGUAAATT  antisense: UUUACUGCAACAUCUCCAUGCTT |
| shHDAC5-1 | GGGAACCATCCTTGGAAATCC (5’ to 3’) |
| shHDAC5-2 | GGAGAGCTCAAGAATGGATTT (5’ to 3’) |

Supplementary Table 2，Sequence for qPCR

| Genes | Sequence |
| --- | --- |
| ASNS | Forward Primer: CCAAGTTCAGTATCCTCTCCAG  Reverse Primer: CTTCATGATGCTCGCTTCCA |
| HDAC5 | Forward Primer: GACAGCTCCCCAGTTTTGGT  Reverse Primer: TGCAGCACGTTTTGCTCCT |
| RXRA | Forward Primer: ATGGACACCAAACATTTCCTGC  Reverse Primer: CCAGTGGAGAGCCGATTCC |

Supplementary Table 3，Primers for ASNS promoter mutation

| Primers | Sequence |
| --- | --- |
| Mut1F | GCTTTTGTTTTATAAAAACTAGACAAATTCTCGAG |
| Mut1R | CTCGAGAATTTGTCTAGTTTTTATAAAACAAAAGC |
| Mut2F | CTTATAGATATCAGATCAAACACTAGAAGAGGCAGAATC |
| Mut2R | GATTCTGCCTCTTCTAGTGTTTGATCTGATATCTATAAG |
| Mut3F | CCACAAAGAGTTTAAAAACGACAAAGGCTAGCTATC |
| Mut3R | GATAGCTAGCCTTTGTCGTTTTTAAACTCTTTGTGG |
| Mut4F | CTTTTTAAAAATTTGATATTCTCAAAACTAAACAAGTGCAGTAC |
| Mut4R | GTACTGCACTTGTTTAGTTTTGAGAATATCAAATTTTTAAAAAG |
| Mut5F | GATTTGTCCGTATGTTCAAAACTCACTGATCTATTTGAAC |
| Mut5R | GTTCAAATAGATCAGTGAGTTTTGAACATACGGACAAATC |

Supplementary Table 4，Sequencing primer for ASNS promoter mutant

| Primers | Sequence |
| --- | --- |
| RVprimer3（Mut1/Mut2） | CTAGCAAAATAGGCTGTCCC |
| Mut3/Mut4 | GACGTCCTATGCTATTC |
| Mut5 | GCTGTGCAGGTTTGGAC |

Supplementary Table 5，Primers for constructing truncated amino acid fragments of HDAC5 and RXRA

| Primers | Sequence |
| --- | --- |
| pcDNA3.1-F | GGTGGCGGATCCGAGCTCGGTACC |
| pcDNA3.1-FLAG-R | GGCTCTAGCTCTGACTACAAAGACCATGACGGTGAT |
| pcDNA3.1-HA-R | GGCTCTAGCTCTTACCCATACGATGTTCCAGAT |
| RXRA-1-3.1-F | GAGCTCGGATCCGCCACCATGGACACCAAACATTTCC |
| RXRA-467-3.1-R  RXRA-98-3.1-R | GTAGTCAGAGCTAGAGCCGGTGGCTTGATGTGGTGCA  GTAGTCAGAGCTAGAGCCCTGGGGGCTACCAGTCC |
| RXRA-99-3.1-F | GAGCTCGGATCCGCCACCATGCTCAATTCACCCATGAAC |
| RXRA-219-3.1-R | GTAGTCAGAGCTAGAGCCGTCCTTGCCCCGCTGCCGCT |
| HDAC5-1-3.1-F | GAGCTCGGATCCGCCACCATGAACTCTCCCAACGAG |
| HDAC5-1115-3.1-R | TGGGTAAGAGCTAGAGCCCAGGGCAGGCTCCTGCTC |
| HDAC5-292-3.1-R | TGGGTAAGAGCTAGAGCCGATCTCAACTGCTCTCTT |
| HDAC5-674-3.1-R | TGGGTAAGAGCTAGAGCCTGTGGTGAAGAGGTGCTT |
| HDAC5-293-3.1-F | GAGCTCGGATCCGCCACCATGACCGGCACGGGGCCTGGGGT |
| HDAC5-675-3.1-F | GAGCTCGGATCCGCCACCATGGGTGTGGTCTATGACACG |
